# Supplementary material for: Molecular mechanism of modulating miR482b level in tomato with botrytis cinerea infection
Source: PubMed Central journal article supplement (PMC8555085; doi:10.1186/s12870-021-03203-2), 2021-10-28
Supplement: 12870_2021_3203_MOESM1_ESM.pdf [file 12870_2021_3203_MOESM1_ESM.pdf]

# Molecular Mechanism of Modulating MiR482b Level in Tomato with Botrytis

## Cinerea Infection

Fangli Wu, Jinfeng Xu, Tiantian Gao, Diao Huang, Weibo Jin\*

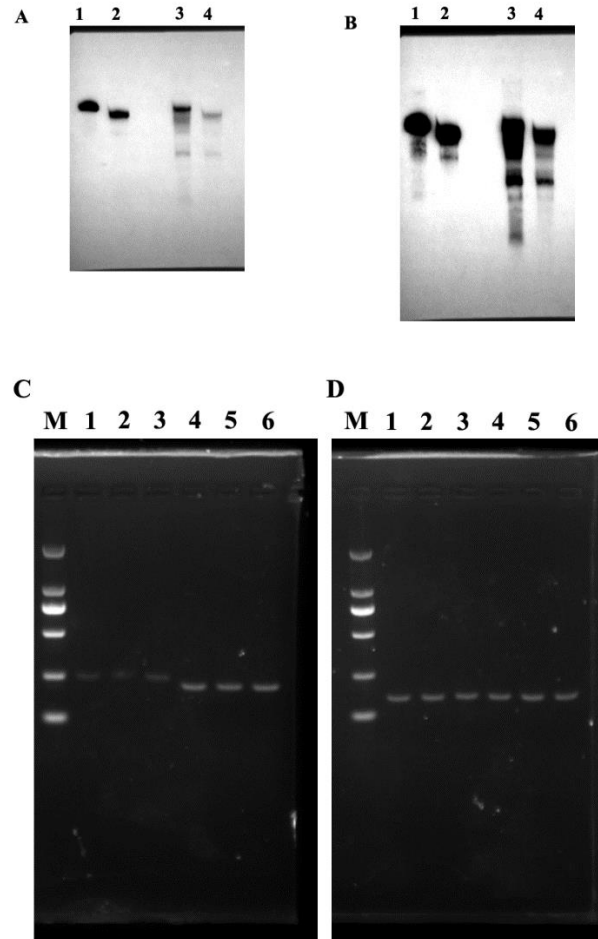

**Figure S1:** Original full-length gel and blot images.

**A-B)** The original blot image of Figure 4A with 10- (A) and 60-second (B) exposure time. Lane 1: pri-miR482b-x1; Lane 2: pri-miR482b-x2; Lane 3: pri-miR482b-x1 with 2 mg/ml protein extraction; Lane 4: pri-miR482b-x2 with 2 mg/ml protein extraction. **C-D)** The original full-length gel image of Figure 4B for pri-miR482b-x1 and pri-miR482b-x2 (C) and *AtUBQ10* (D). Lane M: DL 2000 DNA marker; Lanes 1-3: three OE lines of pri-miR482b-x1 OE plants; Lanes 4-6: three OE lines of pri-miR482b-x2 OE plants.

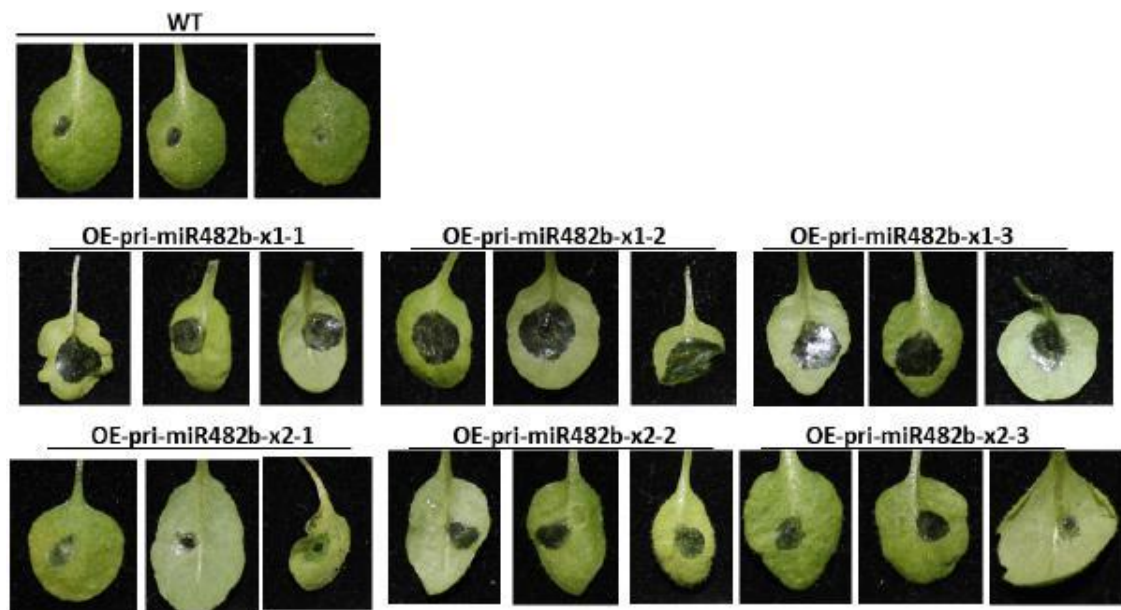

**Figure S2:** Resistance analysis of transgenic *Arabidopsis* overexpressing pri-miR482b-x1 and pri-miR482b-x2 against *B. cinerea*.
